# Supplementary material
Source: publisher figshare collection journal article supplement (https://rs.figshare.com/ndownloader/files/37510106)
Supplement: Supplementary file 1 [file 37510106]

## Sheet: Development & Cognition Data
B_ID	Date	jDate	jDate_adj	Year	Elevation	Total_Mass	Total_length	Mass_woutCalamous.mg.	Length_woutCalam	Bar_average	Cort.pg	Cort_mm	I.TotTrials	I.20.LocErr	I.Tot.LocErr	I.Tot.LocErr_log	R.TotTrials	R.20.LocErr	R.Tot.LocErr	R.Tot.LocErr_log
B_1233	2019-03-15	74	439	2018	Low	5.9	60	5.2	55	2.182375	1261	22.92727273	269	1.25	0.323420074349442	-1.12880326094726	171	0.35	0.128654970760234	-2.05062110314434
B_1239	2019-03-18	77	442	2018	Low	5	56	4.6	52	3.041666667	1636	31.46153846	1	NA	3	1.09861228866811	NA	NA	NA	NA
B_1211	2019-01-25	25	390	2018	High	6.3	62.5	5.6	57	3.73	1770	31.05263158	207	1.7	0.497584541062802	-0.697989805035733	215	0.65	0.125581395348837	-2.07480116212334
B_1213	2019-01-25	25	390	2018	High	5.5	59	5.2	54	2.3455	1351	25.01851852	479	0.85	0.292275574112735	-1.23005817480161	342	0.45	0.236842105263158	-1.44036158239017
B_1214	2019-01-25	25	390	2018	High	5.9	61	5.4	56	3.198666667	1579	28.19642857	50	2	1.06	0.0582689081239758	495	0.3	0.151515151515152	-1.88706964903238
B_1196	2018-12-22	356	356	2018	High	5.8	62.5	5.3	57.5	2.61325	1770	30.7826087	636	0.8	0.166666666666667	-1.79175946922805	265	0.35	0.177358490566038	-1.72958222427616
B_1263	2019-03-29	88	453	2018	High	5.9	63	5.3	58	2.580285714	1664	28.68965517	84	0.9	0.547619047619048	-0.602175402354218	NA	NA	NA	NA
B_1229	2019-03-15	74	439	2018	High	6.6	63	5.9	57.5	2.3831	2023	35.1826087	17	NA	3.52941176470588	1.26113121816588	NA	NA	NA	NA
B_1197	2018-12-22	356	356	2018	High	4.9	59	4.6	54.5	2.370571429	1709	31.35779817	285	1.75	0.294736842105263	-1.22167238142534	380	0.45	0.186842105263158	-1.67749137567912
B_1238	2019-03-18	77	442	2018	High	5.4	58	5	53	2.178	2296	43.32075472	1	NA	5	1.6094379124341	56	0.4	0.178571428571429	-1.7227665977411
B_1205	2018-12-30	364	364	2018	High	6.2	61.5	5.7	56.5	2.3575	1664	29.45132743	5	NA	1.8	0.587786664902119	NA	NA	NA	NA
B_1198	2018-12-22	356	356	2018	High	5.9	59.5	5.4	54	2.767111111	1499	27.75925926	355	1.25	0.349295774647887	-1.05183622387038	383	0.7	0.25065274151436	-1.38368679771281
B_1208	2019-01-11	11	376	2018	High	5.7	59.5	5.4	54.5	1.843375	1565	28.71559633	205	0.7	0.2	-1.6094379124341	81	0.3	0.209876543209877	-1.56123581061622
B_1252	2019-03-29	88	453	2018	High	6.2	62.5	5.6	57	2.267	1410	24.73684211	219	0.55	0.232876712328767	-1.45724609709218	74	0.35	0.162162162162162	-1.81915844341617
B_1255	2019-03-29	88	453	2018	High	5.6	58	5.2	53.5	1.873909091	1499	28.01869159	2	NA	3	1.09861228866811	NA	NA	NA	NA
B_1246	2019-03-24	83	448	2018	High	5.3	57	4.8	53.5	1.920777778	1538	28.74766355	354	0.55	0.127118644067797	-2.06263442336345	144	0.2	0.159722222222222	-1.83431908364685
B_1210	2019-01-25	25	390	2018	High	5.5	59	5	53.5	2.634	1786	33.38317757	240	0.7	0.270833333333333	-1.30625165344636	193	0.45	0.290155440414508	-1.23733849816974
B_1204	2018-12-26	360	360	2018	High	6.4	61.5	6	57	2.50475	1565	27.45614035	282	0.55	0.443262411347518	-0.813593333635812	194	0.45	0.170103092783505	-1.77135059759685
B_1175	2018-08-27	239	239	2018	High	5.8	61	5.2	56	2.610666667	1423	25.41071429	42	1.25	0.785714285714286	-0.241162056816888	NA	NA	NA	NA
B_1237	2019-03-18	77	442	2018	High	6.2	61.5	5.6	57	2.526333333	1351	23.70175439	3	NA	1	0	1	NA	2	0.693147180559945
B_1220	2019-03-11	70	435	2018	High	6.3	60.5	5.7	56	2.286	1593	28.44642857	90	1.1	0.444444444444444	-0.81093021621633	NA	NA	NA	NA
B_1226	2019-03-13	72	437	2018	High	6.3	61.5	5.8	56	NA	2174	38.82142857	132	1.95	0.863636363636364	-0.146603474191875	179	0.7	0.329608938547486	-1.10984836193504
B_1230	2019-03-15	74	439	2018	High	6.4	63.5	5.9	58	2.942571429	1579	27.22413793	8	NA	1	0	NA	NA	NA	NA
B_1245	2019-03-24	83	448	2018	High	6	60	5.3	54.5	3.8535	1435	26.33027523	305	0.95	0.249180327868852	-1.38957843632108	99	0.35	0.141414141414141	-1.95606252051933
B_1216	2019-03-11	70	435	2018	High	5.5	59.5	5.1	55	2.263	1339	24.34545455	152	1.35	0.519736842105263	-0.654432668379255	NA	NA	NA	NA
B_1253	2019-03-29	88	453	2018	High	5.9	61	5.2	55.5	NA	1679	30.25225225	186	1.9	0.602150537634409	-0.507247802418106	NA	NA	NA	NA
B_1200	2018-12-22	356	356	2018	High	5.4	56.5	5.2	51.5	2.094	1867	36.25242718	536	1.35	0.197761194029851	-1.62069506695873	446	0.55	0.219730941704036	-1.51535147334949
B_1219	2019-03-11	70	435	2018	High	6.5	62.5	6	57.5	2.9675	1884	32.76521739	2	NA	2	0.693147180559945	NA	NA	NA	NA
B_1209	2019-01-11	11	376	2018	High	6.1	60.5	5.3	55.5	2.6693	1593	28.7027027	202	1.25	0.544554455445545	-0.607787331608788	53	0.5	0.433962264150943	-0.834797697622973
B_1195	2018-12-12	346	346	2018	High	5.8	61.5	5.4	56.5	2.584666667	1099	19.45132743	468	1	0.230769230769231	-1.46633706879343	350	0.35	0.222857142857143	-1.50122432779387
B_1203	2018-12-26	360	360	2018	High	5.8	58	5.2	52.5	1.8318	1009	19.21904762	228	0.75	0.31140350877193	-1.16666575191312	231	0.3	0.0995670995670996	-2.30692349459264
B_1202	2018-12-26	360	360	2018	High	5.7	61	5.2	56	2.6702	NA	NA	191	2.2	0.418848167539267	-0.870246793372748	155	0.35	0.103225806451613	-2.27083639467946
B_1259	2019-03-29	88	453	2018	High	4.9	61	4.7	56.5	2.55375	1423	25.18584071	112	0.85	0.383928571428571	-0.957298755601533	10	NA	0.8	-0.22314355131421
B_1185	2018-09-25	268	268	2018	High	5.9	62.5	5.5	58	2.02055	NA	NA	386	2.35	0.466321243523316	-0.762880518574621	458	0.45	0.111353711790393	-2.19504355138986
B_1222	2019-03-13	72	437	2018	High	5.7	58	5.2	52.5	2.400125	1621	30.87619048	109	2.45	0.889908256880734	-0.116636903725761	117	0.4	0.290598290598291	-1.23581341018159
B_1244	2019-03-24	83	448	2018	High	5.4	60	5.1	56	2.684142857	903.7	16.1375	297	0.35	0.161616161616162	-1.82253112789481	1	NA	1	0
B_1256	2019-03-29	88	453	2018	High	5.4	NA	NA	NA	NA	NA	NA	164	1.15	0.26219512195122	-1.33866631213063	22	0.25	0.363636363636364	-1.01160091167848
B_1194	2018-10-22	295	295	2018	Low	5.2	NA	NA	NA	NA	NA	NA	78	0.7	0.525641025641026	-0.643136759985283	NA	NA	NA	NA
B_1261	2019-03-29	88	453	2018	High	5.6	63	5.2	57.5	NA	1398	24.31304348	241	1.7	0.348547717842324	-1.05398013464734	183	0.55	0.19672131147541	-1.62596721438531
B_1241	2019-03-18	77	442	2018	Low	5.7	57.5	5.1	53	3.224428571	1565	29.52830189	164	1.05	0.463414634146341	-0.769133087537868	NA	NA	NA	NA
B_1249	2019-03-24	83	448	2018	Low	5.4	62.5	4.9	57	2.590666667	NA	NA	2	NA	3	1.09861228866811	NA	NA	NA	NA
B_1457	2019-12-27	361	361	2019	High	5.6	NA	NA	NA	NA	NA	NA	177	0.65	0.299435028248588	-1.20585781902171	1	NA	5	1.6094379124341
B_1392	2019-09-23	266	266	2019	Low	5.2	59.5	4.8	55	2.393909091	1099	19.98181818	253	1.15	0.217391304347826	-1.52605630349505	230	0.35	0.104347826086957	-2.26002547857524
B_1318	2019-08-20	232	232	2019	Low	6.9	65.5	6.2	60	2.571	NA	NA	148	1.05	0.425675675675676	-0.854077547372582	164	0.95	0.341463414634146	-1.07451473708905
B_1331	2019-08-26	238	238	2019	Low	6.1	61.5	5.7	56	2.861777778	NA	NA	246	0.85	0.219512195121951	-1.51634748936809	241	0.4	0.186721991701245	-1.67813444372033
B_1335	2019-08-26	238	238	2019	Low	5.7	59	5.1	53.5	3.77225	788.9	14.74579439	229	1.55	0.558951965065502	-0.581691739634623	345	0.6	0.31304347826087	-1.16141318990714
B_1330	2019-08-26	238	238	2019	Low	6.4	60	5.8	55.5	2.799307692	2564	46.1981982	210	1.05	0.4	-0.916290731874155	199	0.6	0.160804020100503	-1.82756892192476
B_1315	2019-08-16	228	228	2019	Low	6	59.5	5.5	54.5	2.145777778	NA	NA	195	1.3	0.384615384615385	-0.955511445027435	105	0.85	0.314285714285714	-1.15745278869104
B_1317	2019-08-16	228	228	2019	Low	6.1	60	5.6	55	4.3518	NA	NA	317	1.15	0.236593059936909	-1.44141366034097	292	0.35	0.11986301369863	-2.12140574077887
B_1321	2019-08-23	235	235	2019	Low	6.1	63	5.6	57.5	4.771428571	1423	24.74782609	211	1.35	0.393364928909953	-0.933017525679468	124	1.45	0.556451612903226	-0.586175061007777
B_1324	2019-08-23	235	235	2019	Low	5.9	61	5.4	55	3.475	NA	NA	266	1.05	0.349624060150376	-1.05089681562844	199	1.15	0.331658291457286	-1.10365008269807
B_1325	2019-08-23	235	235	2019	Low	6.7	62.5	5.9	56.5	2.808	1499	26.53097345	284	1.35	0.401408450704225	-0.912775789766711	419	0.55	0.200477326968974	-1.60705412107882
B_1433	2019-10-23	296	296	2019	Low	6.4	65.5	6.1	60	2.8324	NA	NA	379	1.05	0.20844327176781	-1.56808835261541	NA	NA	NA	NA
B_1344	2019-08-30	242	242	2019	Low	7.1	64.5	6.3	58.5	2.616583333	1593	27.23076923	151	1.25	0.397350993377483	-0.922935274592825	154	0.8	0.422077922077922	-0.862565332517992
B_1379	2019-09-23	266	266	2019	High	6.3	61	6	56.5	3.221333333	1867	33.04424779	288	0.8	0.256944444444444	-1.35889538693178	158	0.45	0.29746835443038	-1.21244743131691
B_1464	2020-01-27	27	392	2019	High	5.9	62	5.3	56.5	2.904875	1850	32.74336283	724	1.4	0.19475138121547	-1.63603150200755	383	0.5	0.14621409921671	-1.9226832984455
B_1441	2019-12-24	358	358	2019	High	6.3	62	5.6	56	2.443	1952	34.85714286	414	0.5	0.157004830917874	-1.85147870392968	197	0.35	0.0913705583756345	-2.39283197084182
B_1430	2019-10-04	277	277	2019	High	6.4	61	6	56.5	2.294777778	2078	36.77876106	275	0.95	0.305454545454545	-1.18595429882326	112	0.6	0.294642857142857	-1.22199130982861
B_1447	2019-12-24	358	358	2019	High	6.8	62.5	6.6	57.5	4.0435	1239	21.54782609	291	0.85	0.189003436426117	-1.66599008193902	128	0.55	0.15625	-1.85629799036563
B_1438	2019-12-24	358	358	2019	High	6.9	62.5	6.1	57	2.531	1386	24.31578947	251	0.65	0.187250996015936	-1.67530533742173	181	0.5	0.143646408839779	-1.94040049324434
B_1487	2020-01-29	29	394	2019	High	5.3	58	4.8	53	2.2294	1283	24.20754717	328	1.8	0.573170731707317	-0.556571645554195	157	0.7	0.394904458598726	-0.929111420303217
B_1443	2019-12-24	358	358	2019	High	6.2	63	5.5	57	2.472428571	1351	23.70175439	4	NA	0.75	-0.287682072451781	97	0.45	0.237113402061856	-1.43921676257423
B_1405	2019-10-01	274	274	2019	High	6.9	64	6.1	57.5	3.355111111	1884	32.76521739	301	1	0.232558139534884	-1.45861502269952	145	0.45	0.172413793103448	-1.75785791755238
B_1407	2019-10-01	274	274	2019	High	5.9	NA	NA	NA	NA	NA	NA	74	0.95	0.405405405405405	-0.902867711542015	50	0.55	0.34	-1.07880966137193
B_1382	2019-09-23	266	266	2019	High	6.1	63	5.7	58	2.022111111	NA	NA	145	0.9	0.324137931034483	-1.12658614071052	84	0.3	0.214285714285714	-1.54044504094715
B_1456	2019-12-27	361	361	2019	High	6.1	59.5	4.7	54.5	2.514222222	1473	27.02752294	547	0.5	0.157221206581353	-1.85010150616847	53	0.5	0.30188679245283	-1.19770319131234
B_1429	2019-10-04	277	277	2019	High	6.9	62.5	5.8	57	NA	1448	25.40350877	243	0.45	0.135802469135802	-1.99655388187407	NA	NA	NA	NA
B_1428	2019-10-04	277	277	2019	High	6.8	60.5	6	56	NA	NA	NA	1488	1.1	0.0920698924731183	-2.38520728956491	732	0.2	0.0778688524590164	-2.55272924612676
B_1480	2020-01-27	27	392	2019	High	6.9	63	6.4	57.5	3.940571429	1386	24.10434783	243	1.05	0.296296296296296	-1.21639532432449	260	0.55	0.188461538461538	-1.6688613329049
B_1468	2020-01-27	27	392	2019	High	6.5	62.5	5.6	57.5	2.436545455	1316	22.88695652	266	1	0.191729323308271	-1.65167067605737	29	0.5	0.482758620689655	-0.728238500371216
B_1474	2020-01-27	27	392	2019	High	6.2	61.5	5.5	56.5	NA	896.1	15.86017699	125	0.55	0.408	-0.896488104577975	218	0.7	0.321100917431193	-1.13599982073973
B_1471	2020-01-27	27	392	2019	High	5.6	58.5	5.1	53.5	2.622333333	NA	NA	360	0.35	0.111111111111111	-2.19722457733622	1	NA	6	1.79175946922805
B_1476	2020-01-27	27	392	2019	High	6.9	68	6.2	63	2.582333333	1187	18.84126984	81	0.9	0.530864197530864	-0.633249038978877	161	0.7	0.204968944099379	-1.58489680351798
B_1478	2020-01-27	27	392	2019	High	6.2	60.5	5.6	55	2.594714286	1435	26.09090909	955	1.6	0.139267015706806	-1.97136221225898	445	0.4	0.0898876404494382	-2.4091948280523
B_1481	2020-01-27	27	392	2019	High	6.3	60.5	5.6	56	2.2846	1374	24.53571429	158	1.45	0.379746835443038	-0.968250470804866	NA	NA	NA	NA
B_1445	2019-12-24	358	358	2019	High	6.5	62	5.8	57	3.616	1197	21	733	0.4	0.140518417462483	-1.96241671365702	54	0.25	0.148148148148148	-1.90954250488444
B_1403	2019-10-01	274	274	2019	High	5.5	57.5	5.1	53	2.548666667	1786	33.69811321	168	0.5	0.357142857142857	-1.02961941718116	149	0.5	0.275167785234899	-1.29037423924115
B_1469	2020-01-27	27	392	2019	High	6.7	65	6.1	60.5	3.02	1316	21.75206612	661	0.5	0.183055975794251	-1.69796329425495	374	0.55	0.27807486631016	-1.27986489827316
B_1470	2020-01-27	27	392	2019	High	6.2	62	5.7	57	2.4717	1410	24.73684211	235	0.85	0.302127659574468	-1.19690563710284	104	0.55	0.471153846153846	-0.752570601030746
B_1465	2020-01-27	27	392	2019	High	6.8	62	6	57	2.228722222	1423	24.96491228	340	1.8	0.432352941176471	-0.83851303083147	66	0.75	0.454545454545455	-0.788457360364269
B_1365	2019-09-20	263	263	2019	High	5.8	61	5.3	56	2.483125	1339	23.91071429	210	0.85	0.319047619047619	-1.1424149113265	118	0.85	0.38135593220339	-0.964022134695345
B_1661	2020-11-27	332	332	2020	High	5.8	61.5	5.1	56.5	2.552636364	923.8	16.35044248	20	1.8	1.8	0.587786664902119	105	0.45	0.295238095	-1.21997314647883
B_1669	2020-11-27	332	332	2020	High	5.7	60	5.4	54	2.334125	1012	18.74074074	230	0.9	0.295652174	-1.21857160345297	215	0.3	0.097674419	-2.32611558635662
B_1695	2020-12-08	343	343	2020	Low	5.5	59.5	5.1	55.5	2.301428571	974.2	17.55315315	568	1.5	0.241197183	-1.42214049330179	670	0.1	0.046268657	-3.07329050177083
B_1678	2020-12-02	337	337	2020	High	5.7	60	5	55	2.000722222	1107	20.12727273	202	0.9	0.306930693	-1.18113331258192	254	0.8	0.220472441	-1.51198257603339
B_1688	2020-12-02	337	337	2020	High	5.3	59	4.9	53.75	1.760916667	1473	27.40465116	402	0.65	0.109452736	-2.21226245760985	121	0.65	0.214876033	-1.53769400784449
B_1787	2021-01-05	5	370	2020	Low	6	59.5	5.5	55	2.247125	1249	22.70909091	681	1.3	0.167400881	-1.78736385809712	553	0.45	0.119349005	-2.12570326305652
B_1781	2021-01-05	5	370	2020	Low	5.6	57.5	5	52	2.092142857	862.6	16.58846154	3	NA	5.666666667	1.73460105544693	818	0.45	0.185819071	-1.68298181524331
B_1793	2021-01-05	5	370	2020	Low	5.8	60.5	5.4	55.5	2.422666667	1075	19.36936937	856	0.75	0.185747664	-1.68336617150642	516	0.65	0.131782946	-2.02659905830546
B_1788	2021-01-05	5	370	2020	Low	6.2	63.5	6	58	2.623916667	1099	18.94827586	330	1.05	0.257575758	-1.35644139632315	401	0.45	0.209476309	-1.56314462954659
B_1789	2021-01-05	5	370	2020	Low	5.7	58	5	53	2.407583333	1075	20.28301887	473	1	0.217758985	-1.52436640118463	378	0.25	0.08994709	-2.40853367041519
B_1719	2020-12-18	353	353	2020	Low	6.4	63	5.8	57.5	2.388642857	1377	23.94782609	105	2.05	1.123809524	0.116724274477633	496	0.6	0.112903226	-2.18122423427549
B_1722	2020-12-18	353	353	2020	Low	5.7	57	5.2	53	2.62925	989	18.66037736	130	0.55	0.276923077	-1.28401551172169	242	0.25	0.169421488	-1.77536565711092
B_1723	2020-12-18	353	353	2020	Low	5.5	61	4.7	55.5	2.8105	1150	20.72072072	561	1.9	0.203208556	-1.59352245786504	399	0.3	0.077694236	-2.55497420711439
B_1735	2020-12-18	353	353	2020	High	6.2	62.5	5.5	58	2.435333333	1306	22.51724138	426	1.65	0.284037559	-1.25864879956519	268	0.45	0.108208955	-2.22369115259335
B_1734	2020-12-18	353	353	2020	High	5.4	60	5.2	55	2.352625	1297	23.58181818	201	1	0.412935323	-0.884464301190189	158	0.7	0.208860759	-1.56608747392412
B_1728	2020-12-18	353	353	2020	High	7.1	64	6.2	58.25	2.238928571	1316	22.59227468	NA	NA	NA	NA	3	NA	3.666666667	1.29928298422117
B_1737	2020-12-21	356	356	2020	High	5.5	60.5	5.1	54.4	3.1796	728.1	13.38419118	223	0.95	0.358744395	-1.02514513572374	243	0.7	0.152263374	-1.88214353388551
B_1707	2020-12-08	343	343	2020	Low	5.7	57.5	5.3	53.5	2.156	1203	22.48598131	415	1.35	0.272289157	-1.30089070014668	295	0.65	0.288135593	-1.24432410061421
B_1706	2020-12-08	343	343	2020	Low	5.5	58	4.9	53.5	2.6934	1212	22.65420561	392	0.55	0.102040816	-2.28238238887653	232	0	0.077586207	-2.55636561243681
B_1704	2020-12-08	343	343	2020	Low	6.2	60.5	5.6	54.5	2.503333333	1398	25.65137615	215	1.6	0.441860465	-0.81676113679028	NA	NA	NA	NA
B_1699	2020-12-08	343	343	2020	Low	6	63.5	5.3	57	2.428666667	1067	18.71929825	248	1.6	0.346774194	-1.05908144860915	272	0.6	0.191176471	-1.65455834556072
B_1698	2020-12-08	343	343	2020	Low	6.1	62.5	5.5	58	2.2554	1099	18.94827586	159	0.85	0.257861635	-1.35533213636958	1	NA	5	1.6094379124341
B_1692	2020-12-08	343	343	2020	Low	6.1	61.5	5.6	55	2.306944444	1107	20.12727273	NA	NA	NA	NA	712	0.05	0.04494382	-3.10234201361225
B_1691	2020-12-08	343	343	2020	Low	5.5	57	5.2	51.5	2.71525	1398	27.14563107	NA	NA	NA	NA	384	0.4	0.130208333	-2.03861954971958
B_1697	2020-12-08	343	343	2020	Low	5.2	57	4.6	52.5	2.3483	1083	20.62857143	270	1	0.381481481	-0.963692972030875	718	0.05	0.011142061	-4.49702805261839
B_1716	2020-12-11	346	346	2020	High	6.8	61	5.9	55	2.386181818	1794	32.61818182	78	1.05	0.435897436	-0.830348301838136	NA	NA	NA	NA
B_1708	2020-12-09	344	344	2020	Low	5.2	57.5	4.8	53	2.2124	1107	20.88679245	197	0.85	0.263959391	-1.33196000963733	1	NA	7	1.94591014905531
B_1712	2020-12-11	346	346	2020	Low	6.2	62	5.6	56.5	2.643357143	2278	40.31858407	281	0.85	0.259786477	-1.34789522767851	NA	NA	NA	NA
B_1630	2020-11-11	316	316	2020	High	5.8	60	5.2	54.5	2.506083333	1336	24.51376147	159	1	0.264150943	-1.33123458543686	230	0.3	0.117391304	-2.14224244588183
B_1629	2020-11-11	316	316	2020	High	6.4	64	5.7	58.5	2.759454545	952.3	16.27863248	238	1.85	0.550420168	-0.59707335059246	310	0.6	0.25483871	-1.36712444374635
B_1634	2020-11-11	316	316	2020	High	6.4	61	5.8	56	2.1875	896.1	16.00178571	379	1.15	0.266490765	-1.32241568888473	351	0.55	0.13960114	-1.9689659224981
B_1631	2020-11-11	316	316	2020	High	6.2	59.5	5.5	55.5	1.958358824	1133	20.41441441	196	0.95	0.387755102	-0.947381319049449	NA	NA	NA	NA
B_1637	2020-11-15	320	320	2020	High	6.8	63.5	6.4	58.5	2.5554	1004	17.16239316	209	0.85	0.339712919	-1.0796543739235	177	0.55	0.209039548	-1.56523182003771
B_1625	2020-11-09	314	314	2020	High	5.7	59	NA	54.5	2.440846154	NA	NA	38	1.3	1.473684211	0.387765531330192	106	0.55	0.330188679	-1.10809103336551
B_1600	2020-09-30	274	274	2020	High	6.1	61	5.7	55.5	2.212705882	NA	NA	399	1.75	0.458646617	-0.779475263048443	102	0.55	0.401960784	-0.911400747360451
B_1590	2020-09-21	265	265	2020	High	5.4	59	5	54	1.969916667	1496	27.7037037	220	1.75	0.372727273	-0.986908298356401	204	0.35	0.156862745	-1.85238409166949
B_1613	2020-11-09	314	314	2020	High	5.6	61	5.2	55.5	2.442538462	1194	21.51351351	355	1.15	0.309859155	-1.17163742345573	216	0.35	0.138888889	-1.97408102522201
B_1560	2020-09-04	248	248	2020	High	5.9	59	5.5	54.5	2.3904	NA	NA	283	1	0.402826855	-0.90924844955576	256	0.7	0.16796875	-1.783977328786
B_1598	2020-09-30	274	274	2020	High	5.8	58.5	5.5	53.5	2.4185	1116	20.85981308	212	1.05	0.405660377	-0.902238979302226	360	0.6	0.097222222	-2.33075597224646
B_1603	2020-10-23	297	297	2020	High	6	62.5	5.6	56.5	2.376133333	889.3	15.73982301	212	1.2	0.448113208	-0.802709382060945	225	0.75	0.222222222	-1.50407739777627
B_1562	2020-09-07	251	251	2020	Low	6.2	61	5.7	56	2.56125	966.8	17.26428571	479	1.05	0.202505219	-1.59698961992815	483	0.4	0.093167702	-2.37335416241559
B_1609	2020-11-04	309	309	2020	Low	6.4	63.5	5.7	57.5	2.47	751.1	13.0626087	622	0.95	0.387459807	-0.948143159439396	37	1.1	0.648648649	-0.432864081754612
B_1753	2020-12-28	363	363	2020	High	5.9	61	5.6	55	2.271181818	974.2	17.71272727	696	1.05	0.16954023	-1.77466503519079	580	0.45	0.087931034	-2.43120247630634
B_1767	2021-01-01	1	366	2020	Low	6.2	62	5.5	57	3.043818182	1462	25.64912281	374	0.9	0.235294118	-1.44691898143633	193	0.75	0.119170984	-2.12719597680182
B_1772	2021-01-01	1	366	2020	Low	5.1	57.5	4.6	52	2.257933333	1249	24.01923077	234	0.85	0.337606838	-1.08587326172612	178	0.55	0.179775281	-1.71604764692986
B_1779	2021-01-01	1	366	2020	High	6	60.5	5.4	55.5	2.068285714	1027	18.5045045	1097	1.1	0.113947129	-2.17202071886893	55	0.45	0.454545455	-0.78845735936427
B_1760	2020-12-30	365	365	2020	Low	5.9	62	5.2	56.5	2.243733333	1239	21.92920354	192	1.65	0.46875	-0.757685701697516	NA	NA	NA	NA
B_1778	2021-01-01	1	366	2020	High	5.9	62	5.4	56	3.192333333	1035	18.48214286	1	NA	1	0	NA	NA	NA	NA
B_1775	2021-01-01	1	366	2020	Low	5.5	59.5	5	54	2.757555556	1099	20.35185185	244	1.45	0.303278689	-1.19310313052146	269	0.5	0.141263941	-1.95712521648072
B_1750	2020-12-28	363	363	2020	Low	5.9	61	5.2	56	2.4335	1124	20.07142857	870	2	0.165517241	-1.7986799143643	297	1.05	0.154882155	-1.86509074155274
B_1812	2021-01-11	11	376	2020	Low	5.6	58.5	5.1	53.5	2.300111111	1287	24.05607477	514	0.4	0.145914397	-1.92473515114552	NA	NA	NA	NA
B_1819	2021-01-11	11	376	2020	Low	5.9	57.5	5.1	52	2.488444444	1496	28.76923077	NA	NA	NA	NA	1	NA	0	-Inf
B_1773	2021-01-01	1	366	2020	Low	6.4	64	5.5	58	2.84575	1212	20.89655172	295	1.4	0.244067797	-1.41030923572654	NA	NA	NA	NA
B_1774	2021-01-01	1	366	2020	Low	5.5	60.5	4.9	55.5	2.609636364	1530	27.56756757	171	0.85	0.391812865	-0.936970938380351	52	0.55	0.384615385	-0.955511444027436
B_1180	2018-09-05	248	248	2018	Low	6.5	63.5	5.9	59	2.256444444	1577	26.72881355	NA	NA	NA	NA	NA	NA	NA	NA
B_1232	2019-03-15	74	439	2018	Low	5.8	60	NA	54.5	2.3545	NA	NA	NA	NA	NA	NA	NA	NA	NA	NA
B_1240	2019-03-18	77	442	2018	Low	6.8	63.5	6.3	57	2.198142857	NA	NA	NA	NA	NA	NA	NA	NA	NA	NA
B_1320	2019-08-20	232	232	2019	Low	7.1	61	6.3	55	2.372411765	1067	19.4	NA	NA	NA	NA	NA	NA	NA	NA
B_1323	2019-08-23	235	235	2019	Low	6	60.5	5.4	54.5	2.499571429	966.8	17.73944954	NA	NA	NA	NA	NA	NA	NA	NA
B_1340	2019-08-26	238	238	2019	Low	5.9	62.5	5.3	58.5	2.5736	909.9	15.55384615	NA	NA	NA	NA	NA	NA	NA	NA
B_1414	2019-10-02	275	275	2019	High	6.3	59	5.4	54	1.966416667	NA	NA	NA	NA	NA	NA	NA	NA	NA	NA
B_1425	2019-10-02	275	275	2019	High	6.3	62	5.6	56.5	2.4155	1239	21.92920354	NA	NA	NA	NA	NA	NA	NA	NA
B_1426	2019-10-02	275	275	2020	High	6.1	61.5	5.7	56	2.634555556	786.7	14.04821429	NA	NA	NA	NA	NA	NA	NA	NA
B_1432	2019-10-07	280	280	2019	Low	6.6	64	5.9	69	2.4738125	1316	19.35294118	NA	NA	NA	NA	NA	NA	NA	NA
B_1434	2019-11-13	317	317	2019	Low	5.9	66.5	5.5	62	2.521	1541	24.85483871	NA	NA	NA	NA	NA	NA	NA	NA
B_1553	2020-09-02	246	246	2020	Low	5.9	60.5	5.4	54	1.814857143	836.6	15.49259259	NA	NA	NA	NA	NA	NA	NA	NA
B_1591	2020-09-21	265	265	2020	High	6	62.5	5.4	56.5	2.389133333	1377	24.37168146	NA	NA	NA	NA	NA	NA	NA	NA
B_1592	2020-09-23	267	267	2020	High	6.4	62.5	5.4	56.5	2.383181818	1701	30.10619469	NA	NA	NA	NA	NA	NA	NA	NA
B_1595	2020-09-25	269	269	2020	High	5.5	62.5	5.1	57	2.141416667	1091	19.14035088	NA	NA	NA	NA	NA	NA	NA	NA
B_1596	2020-09-25	269	269	2020	High	5.8	59.5	5.5	54	2.3481	916.8	16.97777778	NA	NA	NA	NA	NA	NA	NA	NA
B_1635	2020-11-11	316	316	2020	High	7	65	6.3	60.5	2.118058824	2157	35.65289256	NA	NA	NA	NA	NA	NA	NA	NA
B_1650	2020-11-23	328	328	2020	Low	6	62	5.4	56	2.280428571	1316	23.5	NA	NA	NA	NA	NA	NA	NA	NA
B_1696	2020-12-08	343	343	2020	Low	5.6	59.5	5	54.5	2.608615385	996.5	18.28440367	NA	NA	NA	NA	NA	NA	NA	NA
B_1794	2021-01-05	5	370	2020	Low	6.3	63.5	5.6	57.5	2.354285714	NA	NA	NA	NA	NA	NA	NA	NA	NA	NA
B_1803	2021-01-05	5	370	2020	High	5.5	59	5	53.5	2.175428571	1194	22.31775701	NA	NA	NA	NA	NA	NA	NA	NA
B_1835	2021-01-26	26	391	2020	High	5.2	59.5	4.6	54	2.5585	1249	23.12962963	NA	NA	NA	NA	NA	NA	NA	NA

## Sheet: Population level Breeding data
Year	Elevation	Nestbox_ID	Male_ID	Female_ID	Clutch_size	Brood_size	Mean_NestlingMass	Coeff_variation_NestlingMass
2018	High	11-C	B_957	B_1169	6	NA	NA	NA
2018	High	12A	B_298	B_1043	8	8	12.21	0.0353433321335299
2018	Low	12	B_832	B_874	7	6	12.2566666666667	0.0406851958769883
2018	High	13	B_250	B_1010	6	6	12.3833333333333	0.0384803602228984
2018	High	18A	B_1167	B_1168	8	8	11.72	0.050872545003297
2018	High	1	B_1050	B_1008	2	NA	NA	NA
2018	High	21A	B_320	B_1014	7	7	12.8114285714286	0.0434510105563714
2018	Low	22-1	B_920	B_369	8	NA	NA	NA
2018	Low	22-4	B_919	B_1151	7	NA	NA	NA
2018	High	22-B	B_41	B_999	7	7	13.1785714285714	0.0438720047967983
2018	Low	23	B_822	B_929	6	6	12.81	0.0419080890912398
2018	Low	25-1	B_859	B_282	6	5	12.372	0.0319366500861048
2018	High	28-2	B_519	B_1015	8	8	12.68	0.0780603450816426
2018	Low	28	B_339	B_3	8	5	13.974	0.0219671571357432
2018	High	29-3	B_752	B_998	8	5	10.428	0.135851365476545
2018	Low	32-1	B_1133	B_1132	6	3	12.1733333333333	0.0433851091354619
2018	High	33-5	B_1010	B_495	7	5	13	0.0237404605569399
2018	High	35-1A	B_778	B_1173	6	8	12.42125	0.0870429617367324
2018	High	35-1	B_1027	B_742	7	6	12.0733333333333	0.0438332346114758
2018	Low	37-2	B_975	B_1161	7	5	12.714	0.0415361728225626
2018	Low	37-3	B_922	B_854	7	7	11.8285714285714	0.0471928692888367
2018	High	39	B_739	B_1170	6	NA	NA	NA
2018	High	40	B_46	B_1122	6	6	12.0733333333333	0.0484823195059795
2018	Low	40	B_1135	B_1134	7	6	12.5083333333333	0.0462957447948426
2018	Low	41-3	B_982	B_1156	7	7	11.9128571428571	0.0690932566776082
2018	Low	43-1	B_238	B_930	8	8	11.4525	0.0627100809446224
2018	Low	45	B_934	B_1162	5	5	9.482	0.129546582599941
2018	Low	46	B_672	B_1110	8	NA	NA	NA
2018	Low	49-1	B_908	B_680	9	8	12.02875	0.0676516180645732
2018	High	4A	B_197	B_245	6	4	12.965	0.0486942819593417
2018	High	5-2	B_148	B_746	7	3	12.74	0.0318936415289011
2018	Low	51	B_716	B_1136	8	8	12.5625	0.0482959871826511
2018	Low	53-1	B_1115	B_1147	7	5	11.034	0.0251207404852266
2018	Low	55-6	B_985	B_1144	8	8	11.49	0.0367454391406587
2018	Low	61-2	B_1006	B_1117	8	7	12.0428571428571	0.0608905783050206
2018	Low	66	B_115	B_692	8	4	12.32	0.0218101117573773
2018	Low	67-1	B_1145	B_933	7	7	12.9642857142857	0.080507714575283
2018	Low	69-1	B_1157	B_1158	7	7	12.5742857142857	0.0668973826778524
2018	High	6A	B_768	B_766	8	8	12.41375	0.0561154143975532
2018	Low	71	B_1155	B_953	8	7	12.23	0.0364815107805988
2018	Low	72	B_951	B_952	7	NA	NA	NA
2018	Low	76	B_1139	B_1146	6	5	12.11	0.0294220012408255
2018	Low	78	B_1138	B_1137	8	8	11.37875	0.05226420350028
2018	Low	80	B_1140	B_1141	6	NA	NA	NA
2018	Low	87	B_1150	B_1149	6	4	13.64	0.0255934065720158
2018	Low	89	B_954	B_1160	8	8	10.8775	0.074396293313056
2018	Low	8	B_927	B_711	9	6	12.9633333333333	0.0860630671124697
2018	Low	94	B_939	B_940	8	8	12.67875	0.0338230149496582
2018	Low	96	B_938	B_1165	6	NA	NA	NA
2018	Low	9	B_421	B_838	8	7	12.5285714285714	0.0710502254385278
2018	High	B18	B_260	B_1087	7	NA	NA	NA
2018	High	B27	B_608	B_1090	7	NA	NA	NA
2018	High	B32	B_700	B_1166	7	7	11.4985714285714	0.0237344254636789
2018	Low	15	B_928	B_820	8	7	12.1166666666667	0.0459176766428008
2018	Low	16	B_237	B_694	6	6	12.1933333333333	0.0312751627567651
2018	High	1A	B_1152	B_989	7	7	11.82	0.0166145497142193
2018	High	22	B_722	B_279	7	5	12.872	0.0383018410281548
2018	High	28-1A	B_1023	B_750	6	5	8.856	0.15935737720831
2018	High	31	B_751	B_1172	6	6	12.9266666666667	0.0446777971937768
2018	Low	34	B_1130	B_1129	7	NA	NA	NA
2018	High	7A	B_990	B_1104	8	8	11.2275	0.085156045929417
2018	Low	83	B_946	B_657	8	8	12.19	0.0538436065017947
2018	High	B11	B_1080	B_804	7	6	12.5983333333333	0.0579374668786279
2018	High	B28	B_1171	B_714	8	8	11.4325	0.0691949007652482
2018	High	1-1	B_738	B_958	8	7	12.9885714285714	0.0641313916394619
2018	High	43	B_787	B_1039	4	3	9.98333333333333	0.0441682089664451
2018	Low	47-1		B_986	6	NA	NA	NA
2018	Low	67-3		B_1163	7	NA	NA	NA
2018	High	10	B_56	B_754	8	8	13.1025	0.0265664267604429
2018	High	12	B_723	B_966	6	3	12.56	0.0481934584408329
2018	High	15	B_306	B_781	9	8	12.4525	0.0498590007129572
2018	High	17-3	B_1120	B_1031	6	6	12.1333333333333	0.0603973378992067
2018	Low	25-2	B_1125	B_876	7	5	11.486	0.0612464808042698
2018	Low	27A	B_330	B_945	7	6	12.3283333333333	0.0671600446053166
2018	Low	29-6	B_427	B_223	8	8	12.2925	0.0450758709758198
2018	Low	30-7	B_1143	B_827	8	8	12.17875	0.0479874679603555
2018	Low	30	B_1153	B_313	9	8	10.825	0.107680277429224
2018	High	31-2	B_730	B_963	5	4	12.265	0.0419372559564615
2018	Low	39-2	B_5	B_299	7	7	12.7585714285714	0.0433272465732519
2018	Low	41-1	B_372	B_801	7	6	12.5466666666667	0.059698496314592
2018	High	43-2	B_192	B_748	8	7	12.0514285714286	0.0478243231124241
2018	Low	51-1	B_643	B_926	7	7	12.4014285714286	0.032516787413617
2018	Low	55-1	B_1003	B_1005	6	6	12.4483333333333	0.0735596173098991
2018	Low	58	B_1118	B_935	7	6	12.0983333333333	0.0595890048069546
2018	Low	5	B_917	B_233	9	8	11.87	0.0556770724559249
2018	Low	90A	B_948	B_1159	8	7	11.3914285714286	0.0585720056778843
2018	High	B24	B_1079	B_1164	7	7	12.8528571428571	0.0702746202559522
2018	High	B2	B_1052	B_1054	6	6	13.315	0.0531543338975583
2018	High	B9	B_80	B_785	8	7	11.14	0.113945852109543
2018	High	17-1	B_706	B_776	7	5	11.852	0.065893836581118
2018	High	24-1	B_17	B_733	8	7	13.1057142857143	0.0763316564085848
2018	High	26	B_961	B_724	8	8	11.98	0.167337363652553
2018	Low	29-3	B_828	B_1131	5	3	11.8766666666667	0.0415257015331712
2018	High	29A	B_791	B_732	7	5	12.666	0.0501158751014649
2018	Low	32-1A	B_456	B_77	9	8	11.38	0.0538993620213657
2018	High	33-2	B_243	B_721	7	7	12.7585714285714	0.0380800721645624
2018	High	33	B_728	B_307	6	5	12.744	0.0309308457907896
2018	Low	37-1	B_976	B_1142	6	6	12.485	0.0557108643951913
2018	Low	39-3	B_983	B_800	6	6	12.8466666666667	0.0598976135996951
2018	Low	43-3	B_924	B_1154	6	6	11.9933333333333	0.0542689902438559
2018	Low	58-3	B_812	B_941	8	8	11.76375	0.046950858917246
2018	Low	65-1	B_943	B_942	8	8	12.23375	0.0717926052044442
2018	High	B17	B_689	B_690	7	6	12.2816666666667	0.0390195469321197
2018	Low	64		B_1001	6	4	10.2025	0.0565685804233836
2018	Low	86		B_949	8	4	11.235	0.128747528472099
2018	Low	13A			8	NA	NA	NA
2018	Low	22-3			8	NA	NA	NA
2018	Low	30-2			6	NA	NA	NA
2018	Low	47-1			6	NA	NA	NA
2018	Low	64			6	4	10.2025	0.0565685804233836
2018	Low	67-3			7	NA	NA	NA
2018	Low	86			8	4	11.235	0.128747528472099
2019	Low	12	B_429	B_874	6	6	12.9816666666667	0.0473188357845669
2019	Low	16	B_1189	B_1300	8	7	12.0128571428571	0.111679305745132
2019	High	17A	B_768	B_1043	9	8	12.08375	0.0502604434532009
2019	High	17	B_767	B_1073	6	3	13.1566666666667	0.0489425096215956
2019	High	21A	B_1167	B_1311	6	NA	NA	NA
2019	Low	22-1	B_822	B_282	6	6	12.72	0.0624928301729819
2019	Low	22-3	B_1291	B_1151	7	7	11.42	0.124553771299094
2019	High	2B-2	B_1072	B_1310	8	8	13.04625	0.0614200553290075
2019	Low	25-3	B_1275	B_1274	7	7	11.8542857142857	0.0891027096902285
2019	Low	28	B_339	B_3	7	7	13.1814285714286	0.0731981562822911
2019	Low	32-2	B_1133	B_1279	6	6	11.8983333333333	0.0768073965578914
2019	High	33-5	B_1010	B_495	7	NA	NA	NA
2019	Low	37-4	B_1277	B_1276	7	6	12.18	0.0217283015767783
2019	High	38-1	B_778	B_1309	6	6	12.47	0.0633591501705143
2019	High	41	B_1177	B_1122	4	3	12.9566666666667	0.0278527314842083
2019	Low	42	B_1280	B_1281	6	6	12.435	0.0373775854672723
2019	Low	45	B_1063	B_1162	6	6	12.2766666666667	0.0554391179778685
2019	Low	47-1	B_1290	B_1156	8	NA	NA	NA
2019	Low	4	B_917	B_1269	7	7	12.0957142857143	0.0500612137894531
2019	Low	50	B_716	B_1136	7	7	12.4042857142857	0.0553836675384422
2019	Low	55-4	B_1233	B_1144	9	8	12.19375	0.0583953364356373
2019	Low	67-2	B_582	B_1302	7	6	12.9883333333333	0.046434429639457
2019	Low	67	B_1299	B_1147	7	5	12.716	0.0383192744151568
2019	Low	71	B_1301	B_1158	6	6	11.365	0.0820196586756476
2019	Low	77	B_1139	B_657	8	1	12.39	NA
2019	Low	80	B_1140	B_1288	7	5	13.802	0.0491999834294416
2019	Low	86	B_1294	B_1293	7	7	12.3271428571429	0.0468771569377679
2019	Low	87B	B_1298	B_1160	8	NA	NA	NA
2019	Low	89	B_1174	B_1148	7	6	12.7566666666667	0.0628193494613704
2019	High	8A	B_197	B_1206	6	6	11.4216666666667	0.0915979335328933
2019	Low	8	B_927	B_711	8	8	12.45375	0.0521391508002448
2019	Low	92	B_1307	B_1312	7	6	12.3583333333333	0.059314835931894
2019	Low	93	B_551	B_1278	8	7	12.1928571428571	0.0615455220205815
2019	Low	94	B_939	B_940	7	7	12.9142857142857	0.061187033874125
2019	High	B32	B_1313	B_714	9	7	11.7657142857143	0.069272724963795
2019	Low	19	B_914	B_691	8	7	12.7628571428571	0.0246102688945062
2019	Low	22-2	B_1268	B_1267	6	6	12.0983333333333	0.0233108519962478
2019	Low	29-3	B_1130	B_1273	6	4	12.1	0.083059564419101
2019	High	32	B_243	B_279	7	7	13.0428571428571	0.0323130425566363
2019	High	35	B_304	B_742	6	6	12.685	0.0510429427995613
2019	Low	37-2	B_576	B_1161	8	7	11.8742857142857	0.0385214831876616
2019	Low	68	B_943	B_692	7	7	12.01	0.0582034244709305
2019	High	6A	B_1152	B_958	8	8	12.085	0.0451755150067827
2019	Low	81	B_1286	B_1285	8	7	12.9157142857143	0.0214746158950858
2019	High	9A	B_990	B_1104	5	2	12.855	0.0643574433285306
2019	High	B19	B_1032	B_1308	6	6	11.7316666666667	0.0889393050771357
2019	High	2-1	B_738	B_989	6	6	12.3216666666667	0.0618812877732551
2019	High	3-2		B_1199	7	NA	NA	NA
2019	Low	43-2		B_1306	6	4	10.265	0.0780584340523874
2019	Low	61-2		B_1163	7	NA	NA	NA
2019	Low	73		B_952	7	NA	NA	NA
2019	High	1-1	B_779	B_1031	6	NA	NA	NA
2019	High	10	B_56	B_754	7	7	13.0871428571429	0.0275210502822865
2019	Low	10	B_832	B_1011	6	6	11.96	0.0871412367937384
2019	High	18-3	B_250	B_721	4	4	13.035	0.0432457201547252
2019	Low	22D	B_1305	B_1304	6	6	12.8066666666667	0.0831011981429333
2019	Low	25-1	B_1125	B_876	7	6	11.555	0.0251525080852814
2019	Low	25-2	B_1153	B_313	8	7	11.36	0.034705135869633
2019	Low	29-6	B_427	B_223	8	8	12.5775	0.0467341328847947
2019	High	31-2	B_730	B_963	6	6	12.2033333333333	0.0432204894927545
2019	High	34	B_306	B_780	5	4	13.975	0.0325535522661699
2019	Low	39-1	B_1270	B_1271	6	6	12.79	0.0592792835175293
2019	Low	41-1	B_372	B_801	7	7	12.7014285714286	0.0685993627527879
2019	Low	41	B_1135	B_1142	4	4	12.49	0.0607397223764765
2019	High	43-2	B_192	B_748	8	8	12.42875	0.0673267231167587
2019	Low	43-3	B_1283	B_368	7	5	10.9316666666667	0.0910453283265294
2019	Low	43	B_104	B_803	7	7	12.4142857142857	0.0267479811742826
2019	Low	49-1	B_1292	B_1005	6	6	12.9383333333333	0.0581173719218373
2019	Low	51-1	B_1284	B_1249	7	7	11.3771428571429	0.0967832021189643
2019	Low	55-1	B_1003	B_926	7	7	11.2257142857143	0.069627569220442
2019	Low	55-7	B_1289	B_1242	7	3	13.7566666666667	0.109411363179153
2019	Low	58-2	B_1234	B_935	6	6	11.7566666666667	0.0740302173944966
2019	High	5	B_148	B_966	5	5	12.232	0.0705053148197988
2019	Low	60	B_1240	B_1232	6	5	13.458	0.0535085485123043
2019	Low	67-4	B_1145	B_710	7	7	12.7457142857143	0.0588151567816702
2019	Low	87	B_954	B_949	7	6	12.82	0.0476879205604812
2019	Low	90A	B_1287	B_1159	8	8	12.2625	0.0657801253406243
2019	Low	9	B_421	B_831	7	7	12.64	0.0426335240041376
2019	High	B16	B_1107	B_1080	7	7	12.5871428571429	0.0207612218527996
2019	High	B31	B_289	B_1164	6	6	12.855	0.0353336138574115
2019	Low	15	B_928	B_1191	7	7	13.0314285714286	0.0851987679889185
2019	High	17-2	B_706	B_776	6	2	11.175	0.0132879126665928
2019	High	21-1	B_722	B_724	7	5	11.72	0.0896777569004898
2019	Low	22-4	B_1297	B_1296	6	5	11.908	0.068541516567284
2019	High	24-1	B_17	B_733	7	7	13.0157142857143	0.0650261632853492
2019	Low	27A	B_237	B_945	6	6	12.8533333333333	0.061586945604906
2019	Low	29-5	B_828	B_827	7	7	12.3942857142857	0.0506328189019517
2019	High	29A	B_791	B_732	7	7	12.9	0.0550369399560875
2019	Low	32	B_1186	B_1131	6	3	13.4933333333333	0.0319393208673794
2019	High	33-2	B_728	B_307	4	4	11.4625	0.0112034795405864
2019	Low	37	B_976	B_77	8	5	12.49	0.0389238118812866
2019	Low	39-2	B_983	B_299	7	6	12.2833333333333	0.119979857248387
2019	Low	39-3	B_924	B_800	7	7	12.3814285714286	0.0806805053663022
2019	Low	43-1	B_1282	B_1154	5	3	12.9066666666667	0.03606189522247
2019	Low	51	B_332	B_1272	6	6	12.7666666666667	0.0864840877859189
2019	Low	62-1	B_1194	B_1001	7	6	12.355	0.0414127219819111
2019	Low	64	B_812	B_941	7	7	12.4628571428571	0.0560362883984953
2019	Low	65-1	B_1074	B_1295	6	6	13.0416666666667	0.0705104800114439
2019	High	B12	B_689	B_690	11	5	12.952	0.05011814293164
2019	High	B6	B_775	B_785	6	5	13.098	0.051661392542054
2019	High	15	B_720	B_781	7	6	12.23	0.12963790177361
2019	High	22B		B_703	5	4	12.9225	0.0599529419619703
2019	Low	75	B_1007		6	NA	NA	NA
2019	Low	82	B_946		8	7	12.55	0.0691163296962596
2019	High	B30	B_1096		4	NA	NA	NA
2019	High	14A			6	NA	NA	NA
2019	High	1			6	NA	NA	NA
2019	High	6			6	NA	NA	NA
2020	Low	2	B_1512	B_1510	7	6	11.4083333333333	0.0530105181337315
2020	Low	3	B_917	B_233	9	8	11.945	0.0424570023712213
2020	Low	9	B_832	B_831	8	7	10.4485714285714	0.0762025968446328
2020	Low	11	B_1190	B_1011	7	NA	NA	NA
2020	Low	13	B_1499	B_819	9	4	9.1825	0.0565831905205578
2020	Low	16	B_1316	B_1300	8	7	12.1642857142857	0.0492077951232378
2020	Low	21A	B_237	B_945	8	3	12.8066666666667	0.0351408408781628
2020	Low	22A	B_1506	B_1505	6	4	11.2325	0.0642782380864834
2020	Low	22C	B_1305	B_1304	8	8	11.27625	0.0745078362136205
2020	Low	22D	B_1436	B_1509	6	6	10.8016666666667	0.0967687630318067
2020	Low	22-1	B_1489	B_1267	7	5	13.33	0.0190450146658457
2020	Low	22-4	B_1291	B_1493	8	7	11.0942857142857	0.0754043652415811
2020	Low	23	B_1297	B_1296	7	6	11.2916666666667	0.0469236212142283
2020	Low	25-3	B_339	B_876	7	6	11.3033333333333	0.0516881868576255
2020	Low	29-6	B_828	B_223	8	8	12.27875	0.0454833335224279
2020	Low	30-7	B_1275	B_313	9	9	9.27222222222222	0.159091711627218
2020	Low	30-9	B_1186	B_827	8	7	9.62714285714286	0.0880119740403812
2020	Low	32-2	B_1133	B_1142	7	6	9.71666666666667	0.127540507873191
2020	Low	36-1	B_456	B_77	9	8	11.99875	0.0432746941423575
2020	Low	36-2	B_1277	B_1504	7	6	11.4566666666667	0.0319501214974614
2020	Low	37-1	B_1488	B_1276	8	7	9.2	0.103500865269481
2020	Low	37-2	B_1180	B_1503	8	6	9.89333333333333	0.151908973619347
2020	Low	39	B_576	B_1492	7	7	9.92142857142857	0.103437326718333
2020	Low	39-2	B_1338	B_1271	8	NA	NA	NA
2020	Low	39-4	B_924	B_1281	7	6	10.285	0.138919416445467
2020	Low	41-1	B_1135	B_801	8	7	9.13857142857143	0.179075528834237
2020	Low	43-1	B_1490	B_803	8	7	9.21714285714286	0.160389091892483
2020	Low	43-2	B_1282	B_368	6	6	10.48	0.241145418759622
2020	Low	45-1	B_983	B_299	8	7	9.87428571428571	0.173958909276685
2020	Low	47-1	B_1500	B_1272	7	7	12.42	0.0617330624387765
2020	Low	55	B_1292	B_1005	6	6	12.27	0.0617162357161166
2020	Low	55-3	B_1284	B_1507	7	5	11.232	0.0425417041567463
2020	Low	55-5	B_1233	B_1324	7	6	9.80833333333333	0.0527937955562087
2020	Low	58-1	B_1344	B_935	6	6	11.59	0.123300744799577
2020	Low	58-2	B_812	B_941	7	7	11.6171428571429	0.0667431525165346
2020	Low	59	B_1234	B_926	8	6	12.7616666666667	0.0405942928606397
2020	Low	61-3	B_1240	B_1232	7	NA	NA	NA
2020	Low	62-1	B_1321	B_1353	7	NA	NA	NA
2020	Low	64B-2	B_1074	B_1295	7	6	12.86	0.0349732106630752
2020	Low	65-1	B_1194	B_1001	7	NA	NA	NA
2020	Low	68	B_943	B_942	8	7	10.7942857142857	0.0886086154707228
2020	Low	75	B_1531	B_1530	5	NA	NA	NA
2020	Low	77	B_1139	B_1146	8	8	10.6625	0.0526179205384827
2020	Low	78	B_1286	B_1508	7	6	12.0233333333333	0.0204044671570424
2020	Low	80	B_1140	B_1288	7	5	11.088	0.0538805753885262
2020	Low	82	B_946	B_1137	9	4	10.4125	0.0870137546792445
2020	Low	87A	B_1303	B_949	7	4	12.9575	0.0260602647191249
2020	Low	87B	B_1498	B_1293	7	6	12.3083333333333	0.0483734239632553
2020	Low	89	B_1174	B_1278	7	5	11.202	0.103324508410288
2020	Low	90A	B_1497	B_1496	6	2	8.04	0.202281790637943
2020	Low	91	B_1495	B_1159	8	NA	NA	NA
2020	Low	92	B_1307	B_1312	9	8	11.09	0.0516062759556016
2020	Low	95	B_938	B_1165	8	6	11.8516666666667	0.0531193433804947
2020	Low	96	B_1513	B_1514	6	5	12.238	0.0431741627605533
2020	High	1-2	B_1221	B_1528	6	3	11.5233333333333	0.119569262506567
2020	High	1	B_1237	B_1215	7	NA	NA	NA
2020	High	4-1	B_1209	B_1197	7	5	12.23	0.047364413566511
2020	High	5-2	B_148	B_966	6	5	13.034	0.0439687069095053
2020	High	7	B_1222	B_1407	7	7	9.77285714285714	0.085750535152109
2020	High	10	B_56	B_754	8	8	13.01	0.0519256482541669
2020	High	15	B_720	B_781	6	6	11.72	0.0299438217219864
2020	High	16	B_767	B_1524	6	5	12.964	0.0354014533386242
2020	High	17-1	B_706	B_776	7	NA	NA	NA
2020	High	18-3	B_250	B_721	4	4	12.455	0.0592781114774218
2020	High	22-3	B_722	B_733	7	5	12.38	0.0525785478524228
2020	High	22B-1	B_1519	B_748	6	4	11.0725	0.102051642688822
2020	High	27	B_1348	B_1202	6	6	10.9216666666667	0.0886345979283614
2020	High	28-1B	B_1185	B_703	6	6	11.345	0.0421207414789612
2020	High	28-1C	B_1529	B_1527	6	4	13.05	0.0788664225541481
2020	High	29A	B_791	B_732	7	7	NA	NA
2020	High	30	B_751	B_1400	5	5	12.528	0.0690520283340218
2020	High	35	B_1259	B_780	6	5	9.91	0.0806255675295184
2020	High	36	B_1516	B_1010	7	NA	NA	NA
2020	High	40-1	B_1406	B_1122	5	4	12.685	0.0537551945782756
2020	High	43B	B_779	B_1031	6	5	11.846	0.0629416794832848
2020	High	43-2	B_1522	B_755	7	7	11.18	0.0529871434502637
2020	High	14A	B_768	B_1043	9	9	12.3544444444444	0.0511222911619988
2020	High	15A	B_707	B_1091	7	7	11.7957142857143	0.0573331428602444
2020	High	17A	B_1042	B_1518	6	6	9.80333333333333	0.215163448360724
2020	High	19A	B_1523	B_1457	8	4	10.865	0.0785354587390403
2020	High	21A-1	B_762	B_1014	7	7	12.1428571428571	0.0308272711394541
2020	High	B4	B_1515	B_1223	7	5	9.92	0.19505071555936
2020	High	B9	B_775	B_785	8	5	12.086	0.0517196751907958
2020	High	B10	B_1196	B_1049	6	6	11.5466666666667	0.0891917412270511
2020	High	B12	B_689	B_690	7	7	11.7714285714286	0.153551121098027
2020	High	B18	B_1107	B_1502	6	NA	NA	NA
2020	High	B21	B_1032	B_1308	6	4	12.7	0.0453605274273595
2020	High	B22	B_1430	B_1521	6	5	11.75	0.0601461928040962
2020	High	B26	B_1096	B_1080	8	6	10.705	0.0642558614833188
2020	High	B30	B_1448	B_1525	5	5	12.366	0.026811979077381
2020	High	B33	B_1068	B_1520	4	NA	NA	NA
2020	Low	25-1	B_1268	B_1501	6	5	12.182	0.0263604522560188
2020	Low	73	B_1007	B_1526	7	5	12.826	0.0363887896221529
2020	High	3-2	B_738	B_1217	6	NA	NA	NA
2020	High	13	B_1176	B_1178	6	5	11.776	0.0221895737236135
2020	High	29-1	B_1023	B_1365	5	5	NA	NA
2020	High	33-5	B_728	B_307	5	2	10.135	0.0634896073882347
2020	High	5A	B_1152	B_958	8	NA	NA	NA
2020	High	8A	B_1198	B_1409	5	NA	NA	NA
2020	Low	71		B_1526	9	NA	NA	NA
2020	High	21		B_1246	7	NA	NA	NA
2020	High	24		B_724	5	2	10.165	0.271990901568067
2020	High	28-3		B_1517	6	NA	NA	NA
2020	Low	31C	B_1494	B_1131	8	6	11.4116666666667	0.0529196324856167
2020	Low	45	B_1320	B_1154	7	6	11.9966666666667	0.0665301058567598
2020	Low	50	B_1491	B_1249	8	6	9.62166666666667	0.031636470739409
2020	High	31-2	B_961	B_963	6	5	12.63	0.0530630673947591
2020	High	7A	B_1167	B_1200	6	NA	NA	NA
2020	High	B29	B_289	B_1164	4	4	13.0475	0.0385729758456762
2020	High	B31	B_1477	B_1064	5	5	12.104	0.0548693439990174
2020	Low	15	B_928	B_1191	7	7	11.3928571428571	0.0285219833823537
2020	Low	27B	B_330		7	NA	NA	NA
2020	Low	67-2	B_1145		8	NA	NA	NA
2020	High	12	B_988		7	6	11.0383333333333	0.0423582617204429
2020	High	32	B_1220		4	NA	NA	NA
2020	High	43A	B_757		5	2	13.34	0.0063607806403588
2020	Low	87			5	NA	NA	NA
2020	High	43			6	NA	NA	NA
